# Supplementary material
Source: PubMed Central journal article supplement (PMC4093992)
Supplement: supp_deu118_deu118supp_table1.pdf [file supp_deu118_deu118supp_table1.pdf]

**Supplementary Table S1** Information obtained from questionnaires and physical examination (in percent) among 8344 healthy men according to alcohol intake the week prior to the visit.

| Variable distribution in percent                | Alcohol intake the week prior to the visit (units) |            |             |                       |            |              |
|-------------------------------------------------|----------------------------------------------------|------------|-------------|-----------------------|------------|--------------|
|                                                 | Young men (group A)                                |            |             | Fertile men (group B) |            |              |
|                                                 | None                                               | 1–20       | >20         | None                  | 1–20       | >20          |
| Period of abstinence >48 h                      | 87                                                 | 85         | 86          | 91                    | 88         | 83*          |
| Season of examination between October and March | 73                                                 | 76         | 74          | 53                    | 60         | 61*          |
| Blood sample after 10 AM                        | 53                                                 | 54         | 55          | 59                    | 51         | 60*          |
| BMI (kg/m <sup>2</sup> )                        |                                                    |            |             |                       |            |              |
| <20                                             | 18                                                 | 16         | 14          | 4                     | 3          | 4*           |
| 20–24.99                                        | 64                                                 | 66         | 67          | 37                    | 47         | 40           |
| ≥25                                             | 19                                                 | 18         | 19          | 59                    | 50         | 57           |
| Year of examination                             |                                                    |            |             |                       |            |              |
| 1992–2000                                       | 36                                                 | 36         | 31*         | 62                    | 79         | 84*          |
| 2001–2007                                       | 64                                                 | 64         | 69          | 38                    | 21         | 16           |
| Mean age and SD at time of examination (years)  | 19.4 (1.3)                                         | 19.4 (1.4) | 19.3 (1.5)  | 31.1 (5.5)            | 31.5 (5.0) | 32.2 (5.1)   |
| Current smoking                                 | 33                                                 | 43         | 53*         | 20                    | 25         | 49*          |
| Exposure to mother's smoking <i>in utero</i>    | 29                                                 | 30         | 33          | 17                    | 23         | 29*          |
| Mean weekly beer intake and SD (units)          | –                                                  | 6.5 (5.1)  | 19.9 (11.7) | –                     | 4.1 (4.0)  | 19.6 (13.0)* |
| Mean weekly wine intake and SD (units)          | –                                                  | 0.9 (1.9)  | 2.1 (4.0)   | –                     | 2.2 (3.2)  | 6.6 (7.9)*   |
| Mean weekly liquor intake and SD (units)        | –                                                  | 2.0 (3.2)  | 11.7 (14.5) | –                     | 0.9 (1.8)  | 4.9 (8.6)*   |
| Genital surgery <sup>a</sup>                    | 7                                                  | 7          | 5           | 10                    | 11         | 13           |
| Urogenital infections <sup>b</sup>              | 5                                                  | 5          | 7*          | 16                    | 20         | 20           |
| Cryptorchidism <sup>c</sup>                     | 9                                                  | 10         | 9           | 5                     | 9          | 8*           |
| Social class <sup>d</sup>                       |                                                    |            |             |                       |            |              |
| 1                                               | 18                                                 | 24         | 29*         |                       |            |              |
| 2                                               | 21                                                 | 21         | 23          |                       |            |              |
| 3                                               | 10                                                 | 10         | 10          |                       |            |              |
| 4                                               | 41                                                 | 37         | 37          |                       |            |              |
| 5                                               | 11                                                 | 8          | 8           |                       |            |              |
| Missing                                         |                                                    |            |             |                       |            |              |

<sup>a</sup>Operated for hernia, varicocele, testis torsion or testis cancer.<sup>b</sup>Epididymitis, cystitis, prostatitis, gonorrhoea, chlamydia.<sup>c</sup>With or without spontaneous descent.\**P* < 0.05 in Chi square test or analyses of variance for mean values.
