# Supplementary material
Source: PubMed Central journal article supplement (PMC4093992)
Supplement: supp_deu118_deu118supp_table2.pdf [file supp_deu118_deu118supp_table2.pdf]

**Supplementary Table SII** Adjusted<sup>a</sup> results from the regression analyses ( $\beta$  coefficients) with 95% confidence intervals of serum reproductive hormones among 8344 young (group A) and fertile men (group B) according to alcohol intake the week prior to the visit.

| Alcohol intake the week prior to the visit (units) | FSH <sup>b</sup> (IU/l) |                 | LH <sup>b</sup> (IU/l) |                   | Testosterone (nmol/l) |                   | SHBG (nmol/l)    |                   | Free testosterone (pmol/l) |                    | Inhibin B (pg/ml) |                    |
|----------------------------------------------------|-------------------------|-----------------|------------------------|-------------------|-----------------------|-------------------|------------------|-------------------|----------------------------|--------------------|-------------------|--------------------|
| Young men (group A)                                |                         |                 |                        |                   |                       |                   |                  |                   |                            |                    |                   |                    |
| 0                                                  | -1.3                    | -5.7;3.3        | <b>-3.4</b>            | <b>-6.8; -0.1</b> | <b>-0.6</b>           | <b>-1.1; -0.1</b> | 0.2              | -0.6;1.1          | <b>-10.1</b>               | <b>-18.6; -1.6</b> | -2.1              | -8.8;4.6           |
| 1-10                                               | <b>Reference</b>        |                 | <b>Reference</b>       |                   | <b>Reference</b>      |                   | <b>Reference</b> |                   | <b>Reference</b>           |                    | <b>Reference</b>  |                    |
| 11-20                                              | -1.8                    | -5.7;2.3        | -0.3                   | -3.6;3.2          | <b>0.7</b>            | <b>0.2;1.2</b>    | -0.6             | -1.4;0.1          | <b>15.9</b>                | <b>8.3;23.4</b>    | -0.8              | -6.7;5.1           |
| >20                                                | -4.4                    | -8.6;0.0        | 0.8                    | -2.9;4.6          | <b>1.0</b>            | <b>0.5;1.6</b>    | <b>-1.6</b>      | <b>-2.4; -0.8</b> | <b>24.6</b>                | <b>16.3;32.9</b>   | 0.3               | -6.2;6.8           |
| Fertile men (group B)                              |                         |                 |                        |                   |                       |                   |                  |                   |                            |                    |                   |                    |
| 0                                                  | <b>6.8</b>              | <b>1.0;13.0</b> | 1.4                    | -2.9;6.0          | -0.4                  | -1.1;0.3          | -0.6             | -2.0;0.8          | -3.4                       | -11.6;4.8          | <b>-16.3</b>      | <b>-25.0; -7.6</b> |
| 1-10                                               | <b>Reference</b>        |                 | <b>Reference</b>       |                   | <b>Reference</b>      |                   | <b>Reference</b> |                   | <b>Reference</b>           |                    | <b>Reference</b>  |                    |
| 11-20                                              | 3.1                     | -4.0;10.7       | -1.0                   | -6.3;4.6          | -0.1                  | -1.0;0.7          | <b>-2.3</b>      | <b>-4.0; -0.5</b> | 7.4                        | -2.9;17.8          | -0.7              | -11.8;10.2         |
| >20                                                | 2.2                     | -6.2;11.5       | 2.9                    | -3.7;10.0         | 0.9                   | -0.2;1.9          | -1.6             | -3.7;0.5          | <b>19.7</b>                | <b>7.1;32.2</b>    | -2.1              | -15.6;11.3         |

<sup>a</sup>Adjusted for current smoking, BMI, age, center and time of sampling of blood sample (8.00 AM reference).

<sup>b</sup>FSH and LH were transformed by the use of natural logarithm and back transformed providing the percentages change.
